# Supplementary material for: Orientational ordering of guest induced structural phase transition coupled with switchable dielectric properties in a host–guest crystal: bis(thiourea) thiazolium chloride
Source: Royal Society of Chemistry journal article supplement (doi:10.1039/c6ra23952h), 2016-01-01
Supplement: c6ra23952h1.pdf [file c6ra23952h1.pdf]

## Supporting Information

### Orientalional ordering of guests induced structural phase transition coupled with switchable dielectric property in a host-guest crystal: bis(Thiourea) thiazolium chloride

Yu-Ling Liu,<sup>\*a</sup> Zhong-Xia Wang,<sup>a,b</sup> Xiang-Bin Han,<sup>a</sup> Yu-Ling Sun,<sup>a</sup> and Donald E. Pryor<sup>b</sup>

<sup>a</sup>Ordered Matter Science Research Center, College of Chemistry and Chemical Engineering, Southeast University, Nanjing 211189, PR China. E-mail: 230149501@seu.edu.cn.

<sup>b</sup>Chemistry and Biochemistry Department, College of Arts and Sciences, Kent State University, Kent Ohio 44240, USA

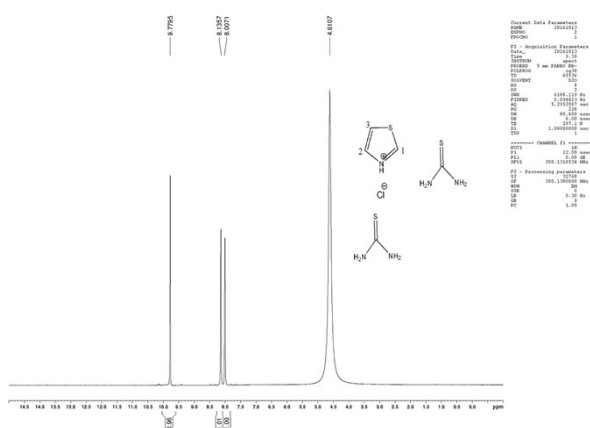

Fig. S1 <sup>1</sup>H NMR (D<sub>2</sub>O) spectrum of **1**.

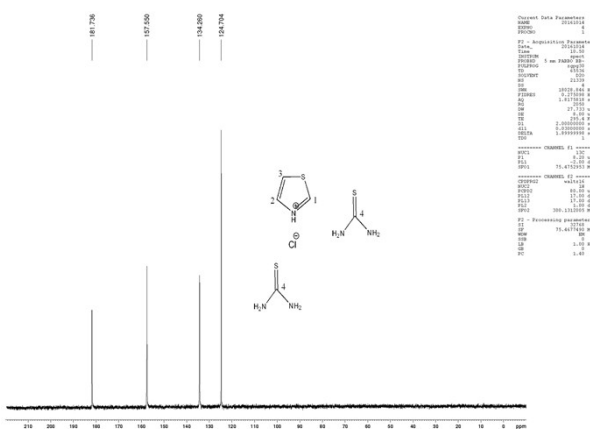

Fig. S2 <sup>13</sup>C NMR (D<sub>2</sub>O) spectrum of **1**.

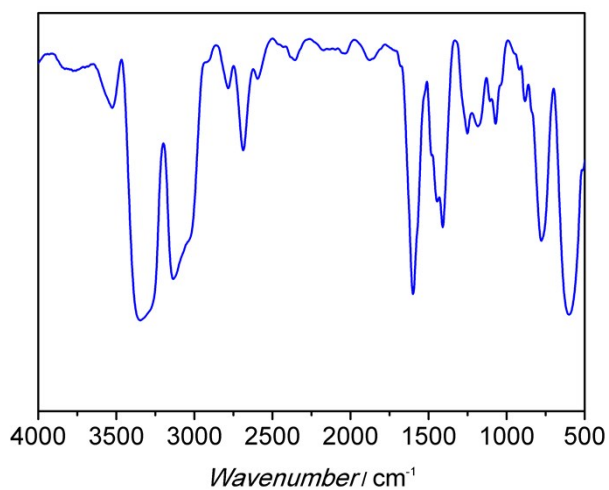

**Fig. S3** Infrared (IR) spectra of **1** measured at room temperature.

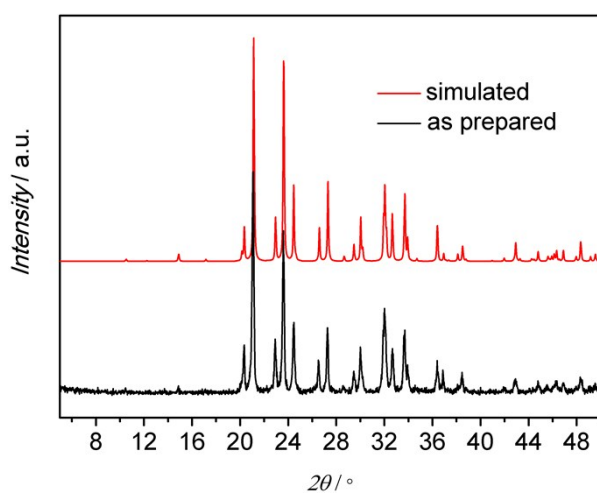

**Fig. S4** PXRD pattern for the as-prepared samples of **1** and the simulated one based on the single crystal structure at 273 K.

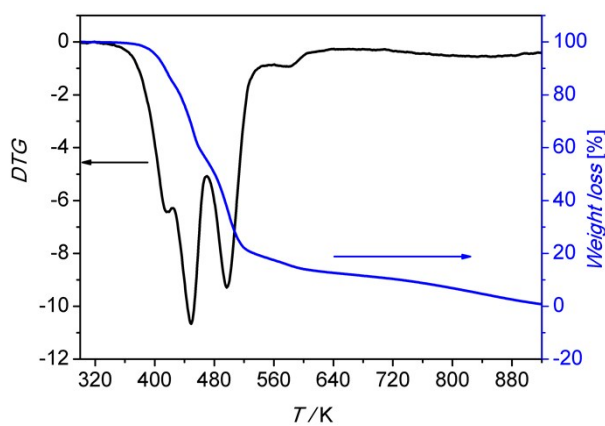

**Fig.S5** TGA measurement of **1** in the temperature range of 300–920 K.

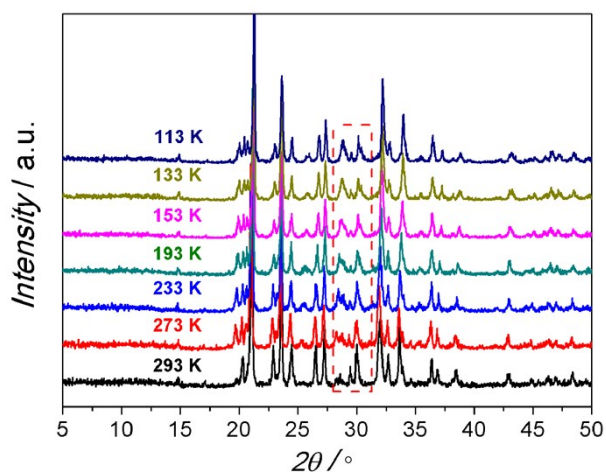

**Fig. S6** Variable-temperature PXRD pattern for the as-prepared samples of **1**.

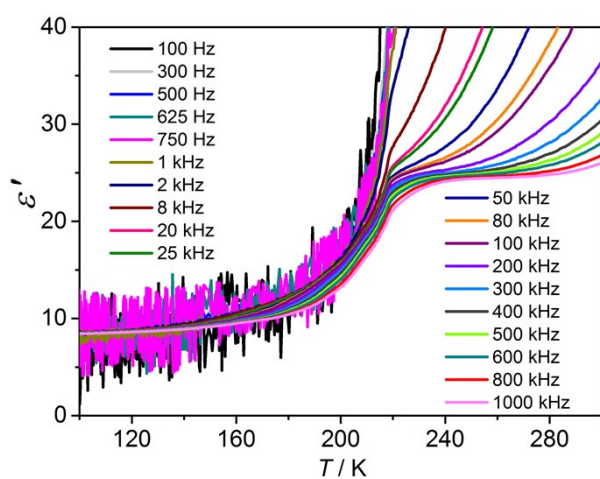

**Fig. S7** Real part of dielectric permittivity of **1** as a function of temperature at different frequencies on cooling.

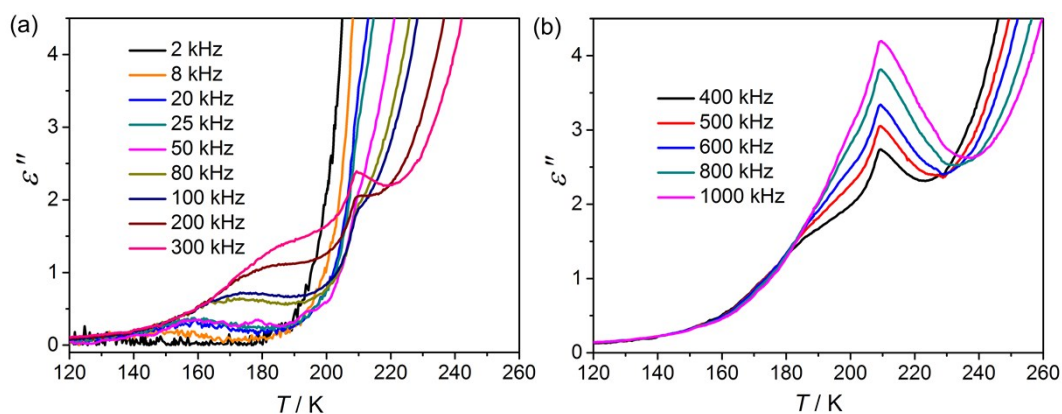

**Fig. S8** Imaginary part of dielectric permittivity of **1** as a function of temperature at different frequencies on cooling.

**Table S1.** The elemental analysis results of **1**.

|                      | N     | C     | S     | H    |
|----------------------|-------|-------|-------|------|
| 0-theoretical        | 25.58 | 21.93 | 35.13 | 4.42 |
| 1-experimental       | 25.23 | 21.65 | 35.52 | 4.76 |
| 2-experimental       | 25.26 | 21.72 | 35.57 | 4.89 |
| 3-experimental       | 25.31 | 21.55 | 35.38 | 4.84 |
| average experimental | 25.27 | 21.64 | 35.49 | 4.83 |

**Table S2.** Hydrogen bonds of **1** at 273 K and 133 K.

|      | $D-H\cdots A$        | $D-H$ | $H\cdots A$ | $D\cdots A$ | $\angle D-H\cdots A$ |
|------|----------------------|-------|-------------|-------------|----------------------|
| 273K | N(1)–H(1A)···Cl(1)#1 | 0.86  | 2.52        | 3.307(3)    | 153                  |
|      | N(1)–H(1B)···S(1)#2  | 0.86  | 2.54        | 3.396(4)    | 175                  |
| 133K | N(1)–H(1A)···Cl(1)#3 | 0.86  | 2.47        | 3.259(2)    | 153                  |
|      | N(1)–H(1B)···S(1)#4  | 0.86  | 2.52        | 3.372(3)    | 170                  |
|      | N(2)–H(2A)···Cl(1)#3 | 0.86  | 2.51        | 3.292(2)    | 151                  |
|      | N(2)–H(2B)···S(1)#5  | 0.86  | 2.51        | 3.369(3)    | 174                  |
|      | N(3)–H(3B)···S(1)    | 0.86  | 2.43        | 3.320(8)    | 169                  |

Symmetry codes: #1  $x+1/2, y-1/2, z$ ; #2  $-x+1/2, -y+3/2, -z$ ; #3  $-x+2, y+1/2, -z+3/2$ ; #4  $-x+2, -y, -z+1$ ; #5  $-x+2, -y, -z+2$ .
